# Supplementary material for: Achieving exceptional energy storage performance in PbHfO3 antiferroelectric ceramics through defect engineering design
Source: Royal Society of Chemistry journal article supplement (doi:10.1039/d4mh01788a), 2025-01-01
Supplement: d4mh01788a1.pdf [file d4mh01788a1.pdf]

**Achieving Exceptional Energy Storage Performance in PbHfO<sub>3</sub> Antiferroelectric Ceramics  
through Defect Engineering Design**

Jiawen Hu<sup>a</sup>, Zhixin Zhou<sup>a</sup>, Ling Lv<sup>a</sup>, Wei Zhang<sup>a</sup>, Sen Chen<sup>a</sup>, Jinjun Liu<sup>a</sup>, Peng Li<sup>b</sup>, Ning Liu<sup>c\*</sup>, Tao Zeng<sup>d\*</sup> and Zhongbin Pan<sup>a\*</sup>

<sup>a</sup>*School of Materials Science and Chemical Engineering, Ningbo University, Ningbo, Zhejiang, 315211, China. E-mail: panzhongbin@nbu.edu.cn (Z. Pan)*

<sup>b</sup>*School of Materials Science and Engineering, Liaocheng University, Liaocheng, Shandong, 252059, China.*

<sup>c</sup>*Engineering & Technology Center for Aerospace Materials, Wuzhen Laboratory, 925 Daole Road, Jiaxing 314500, China. E-mail: liun@wuzhenlab.com (N. Liu)*

<sup>d</sup>*School of Materials Science and Engineering, Jingdezhen Ceramic University, Jingdezhen 333403, E-mail: zengtao0626@126.com (T. Zeng)*

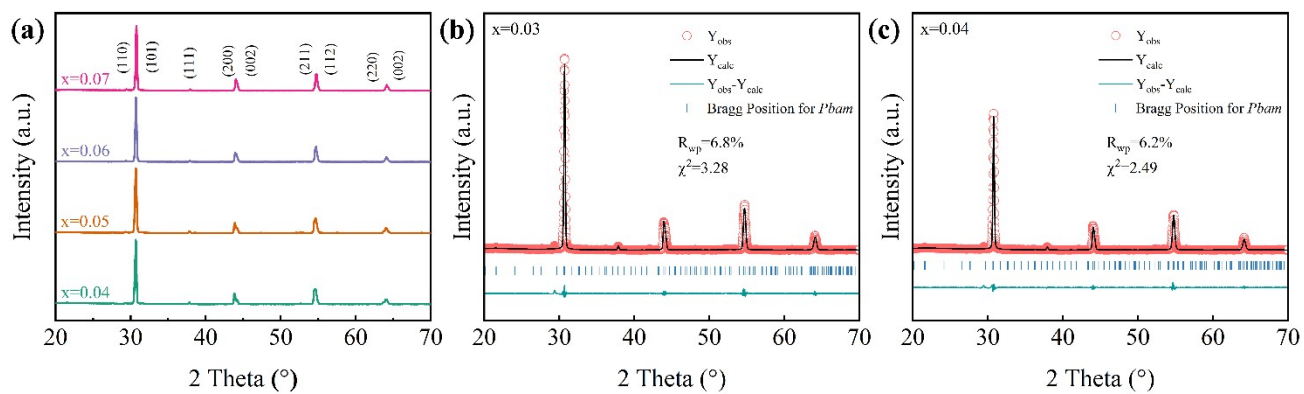

**Fig. S1** (a) XRD patterns of PSLHST ceramics. (b)-(c) XRD refinement of PLHST3 and PLHST4 ceramics.

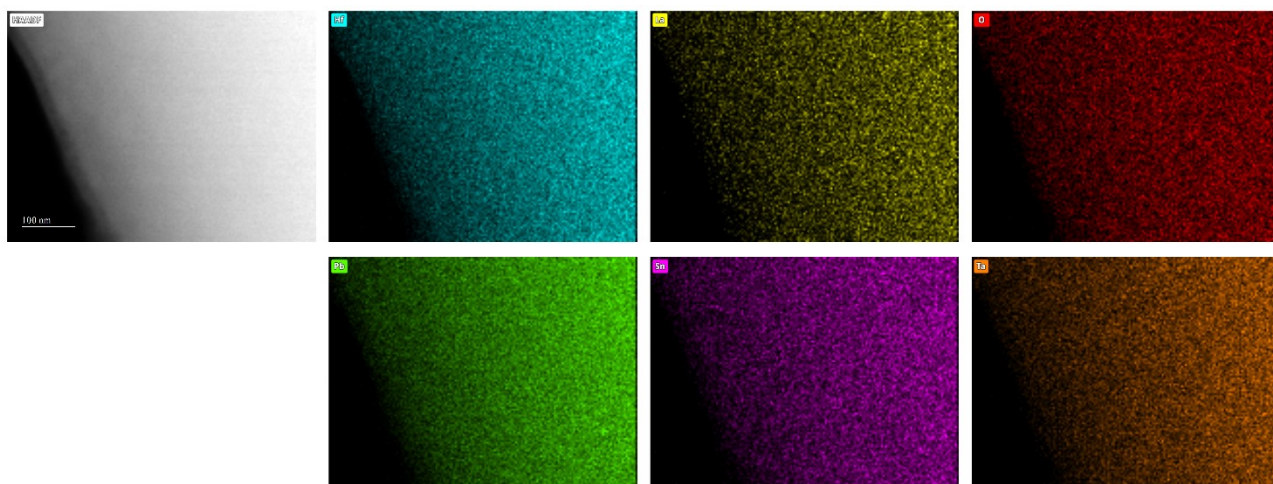

**Fig. S2** TEM images and corresponding EDS energy spectra of PLHST2 ceramics.

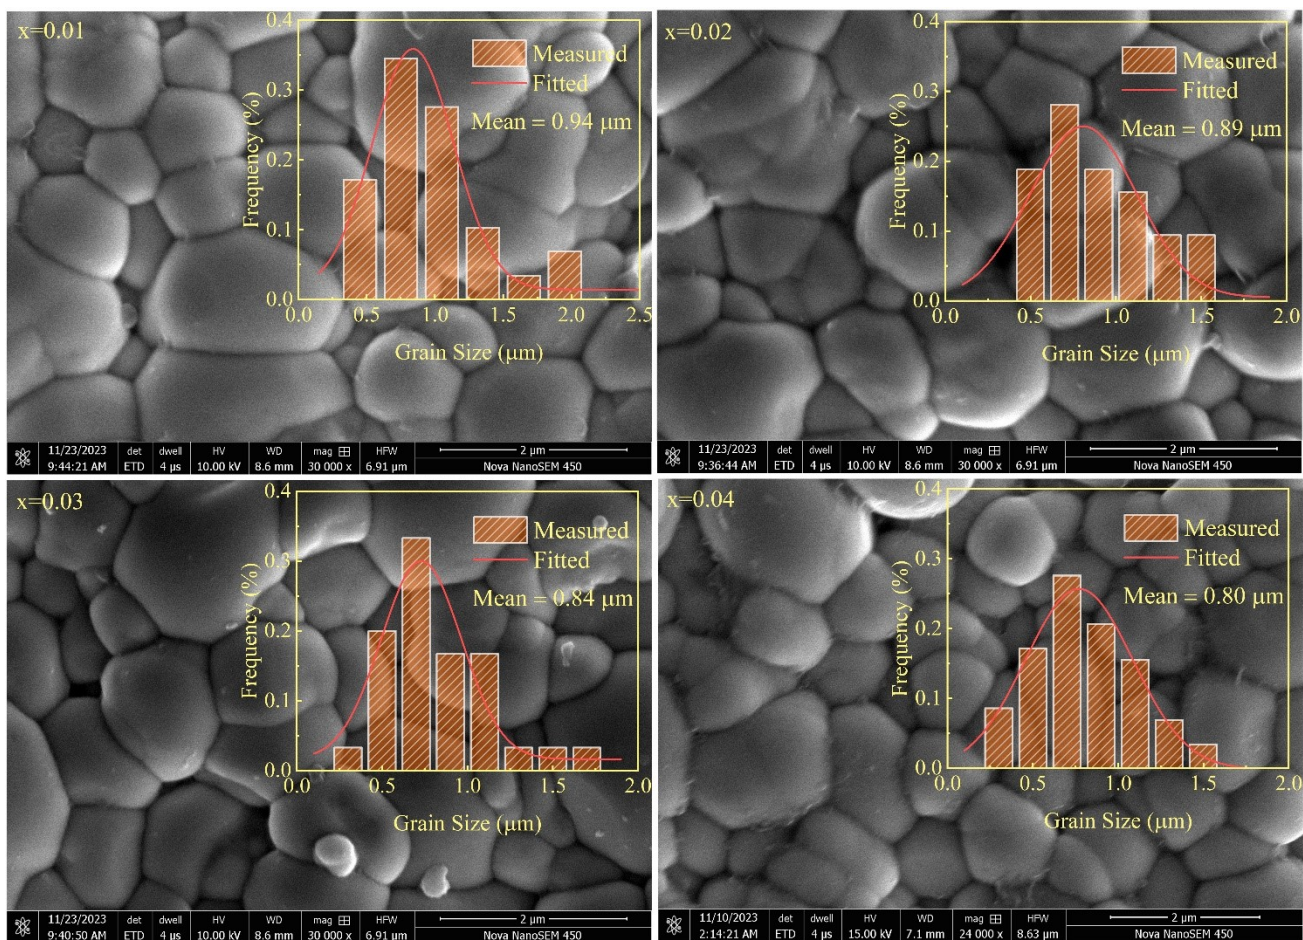

**Fig. S3** SEM image and corresponding grain size distributions of PLHST ceramics.

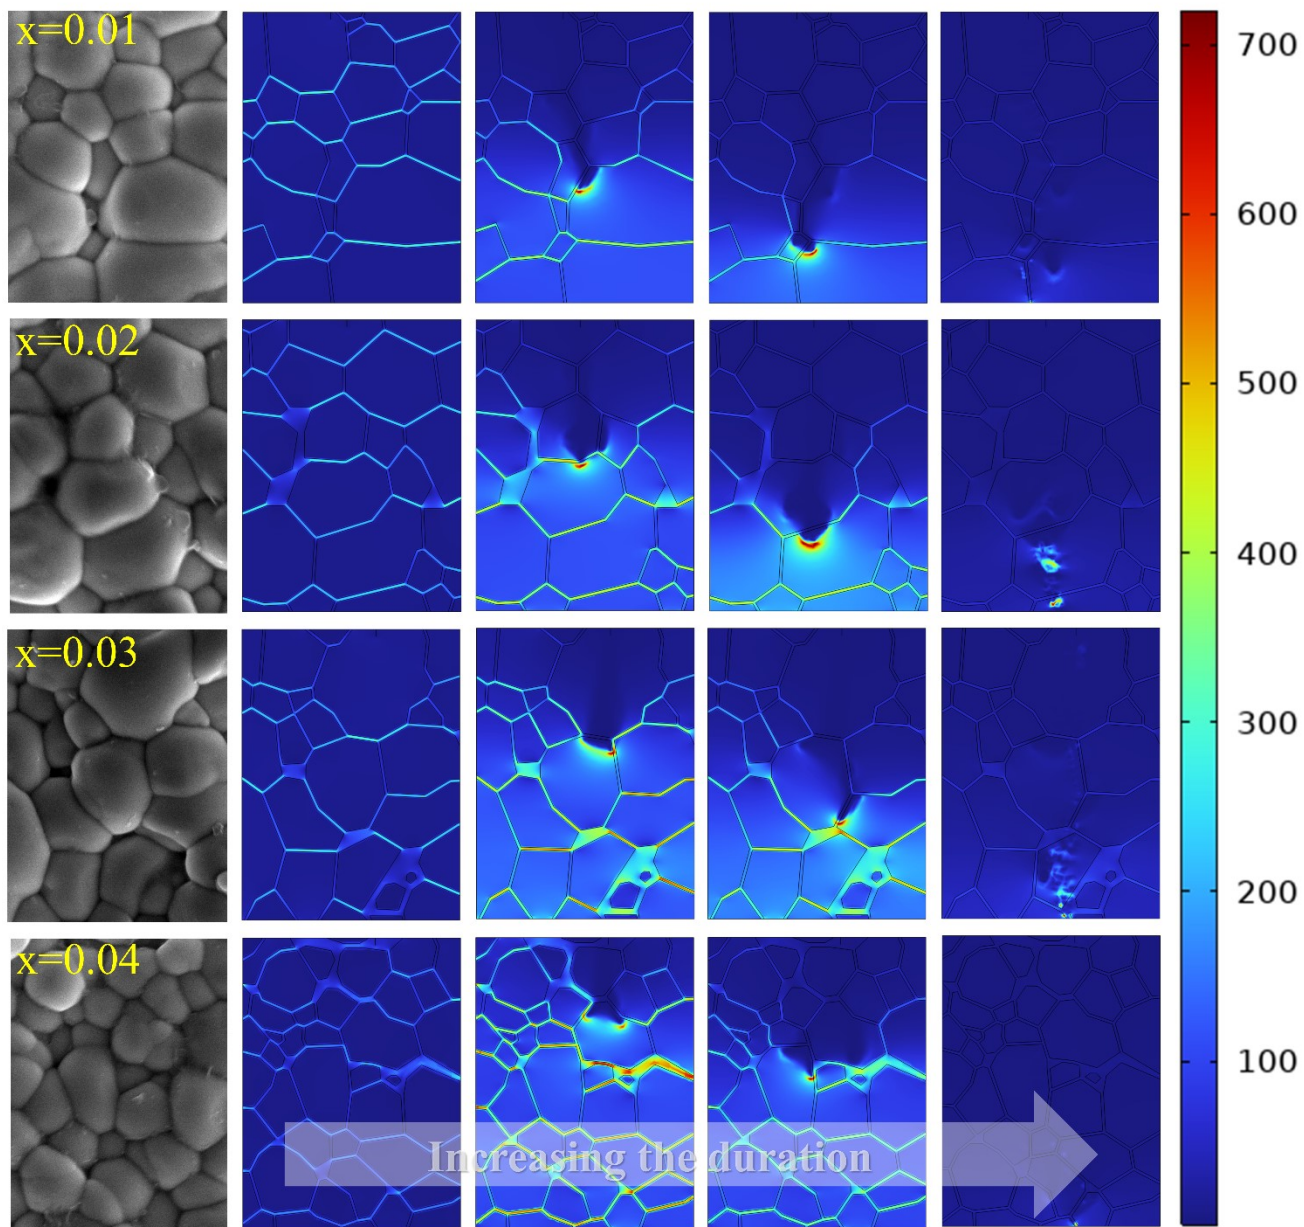

**Fig. S4** Electric field evolution with time in PLHST ceramics.

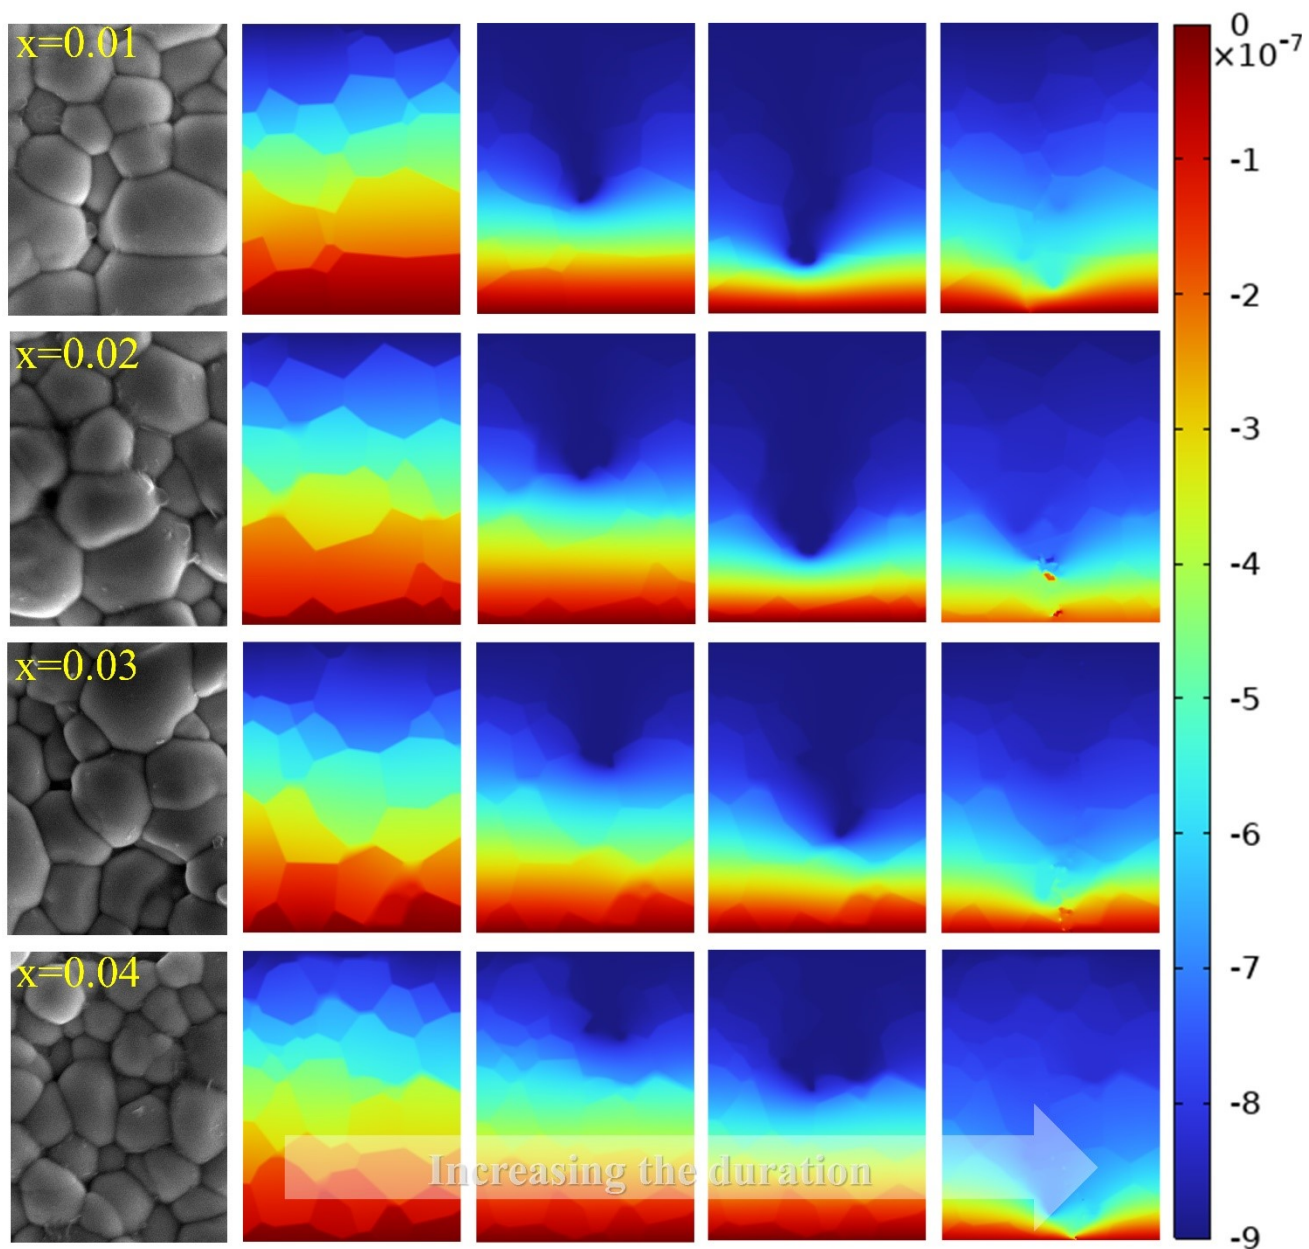

**Fig. S5** Electric potential evolution with time in PLHST ceramics.

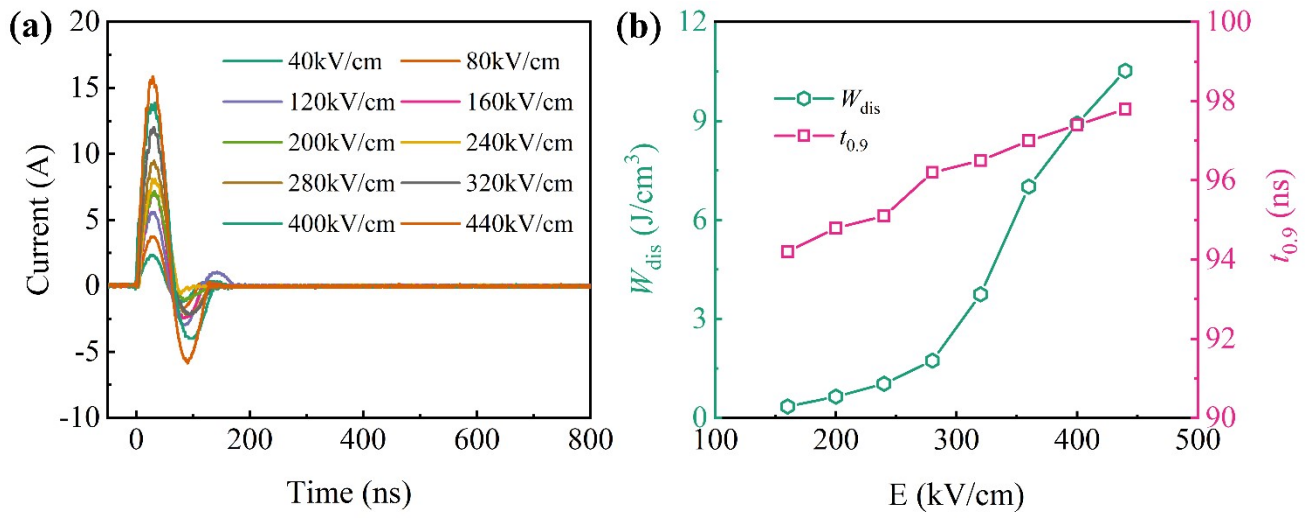

**Fig. S6** (a) Underdamped discharge curves of the PLHST2 ceramic. (b)  $t_{0.9}$  and  $W_{\text{dis}}$  as functions of the electric field.

Table S1 Refined lattice parameters and other agreement factors.

| Composition | Space group | $R_{wp}$ (%) | $\chi^2$ (%) | Volume ( $\text{\AA}^3$ ) | Lattice parameters ( $\text{\AA}$ ) |          |
|-------------|-------------|--------------|--------------|---------------------------|-------------------------------------|----------|
| x=0.01      | <i>Pbam</i> | 7.3          | 3.65         | 554.465                   | a                                   | 5.81715  |
|             |             |              |              |                           | b                                   | 11.66059 |
|             |             |              |              |                           | c                                   | 8.17416  |
| x=0.02      | <i>Pbam</i> | 6.6          | 3.03         | 554.025                   | a                                   | 5.81783  |
|             |             |              |              |                           | b                                   | 11.64778 |
|             |             |              |              |                           | c                                   | 8.1757   |
| x=0.03      | <i>Pbam</i> | 6.8          | 3.28         | 553.697                   | a                                   | 5.8066   |
|             |             |              |              |                           | b                                   | 11.62389 |
|             |             |              |              |                           | c                                   | 8.17387  |
| x=0.04      | <i>Pbam</i> | 6.2          | 2.49         | 552.097                   | a                                   | 5.81445  |
|             |             |              |              |                           | b                                   | 11.6072  |
|             |             |              |              |                           | c                                   | 8.18048  |
